# Supplementary material for: Structural Basis of Egg Coat-Sperm Recognition at Fertilization
Source: PubMed Central journal article supplement — Cell. 2017 Jun 15;169(7):1315–1326.e17. doi: 10.1016/j.cell.2017.05.033 (PMC5480393; doi:10.1016/j.cell.2017.05.033), 2017-06-15
Supplement: mmc1.pdf [file mmc1.pdf]

**Cell, Volume 169**

## **Supplemental Information**

### **Structural Basis of Egg Coat-Sperm**

#### **Recognition at Fertilization**

**Isha Raj, Hamed Sadat Al Hosseini, Elisa Dioguardi, Kaoru Nishimura, Ling Han, Alessandra Villa, Daniele de Sanctis, and Luca Jovine**

**Table S1. Data Collection and Refinement Statistics for VERL Repeats 1-3, Related to Figures 1, 5 and 7**

|                                       | mMBP-VR1+<br>[PDB: 5II4]  | mMBP-VR1<br>[PDB: 5II5]   | mMBP-VR3<br>[PDB: 5IIC]   | VR2+<br>[PDB: 5MR2]       |
|---------------------------------------|---------------------------|---------------------------|---------------------------|---------------------------|
| <b>Data Collection</b>                |                           |                           |                           |                           |
| Wavelength (Å)                        | 0.9762                    | 0.9762                    | 0.9762                    | 0.8729                    |
| Resolution range (Å)                  | 46.4 - 2.00 (2.07 - 2.00) | 37.8 - 1.80 (1.86 - 1.80) | 47.0 - 2.90 (3.00 - 2.90) | 47.0 - 2.50 (2.59 - 2.50) |
| Space group                           | <i>P</i> 65 2 2 (179)     | <i>P</i> 65 2 2 (179)     | <i>P</i> 1 21 1 (4)       | <i>C</i> 1 2 1 (5)        |
| Cell dimensions                       |                           |                           |                           |                           |
| <i>a</i> , <i>b</i> , <i>c</i> (Å)    | 107.12, 107.12, 195.85    | 107.09, 107.09, 196.35    | 58.33, 81.64, 111.63      | 69.92, 79.19, 81.24       |
| <i>α</i> , <i>β</i> , <i>γ</i> (°)    | 90, 90, 120               | 90, 90, 120               | 90, 99.60, 90             | 90, 102.62, 90            |
| Total reflections                     | 217941 (20613)            | 366414 (35608)            | 91100 (8909)              | 67133 (6520)              |
| Unique reflections                    | 44601 (4369)              | 61782 (6065)              | 22738 (2230)              | 15039 (1495)              |
| Multiplicity                          | 4.9 (4.7)                 | 5.9 (5.9)                 | 4.0 (4.0)                 | 4.5 (4.4)                 |
| Completeness (%)                      | 97.7 (97.8)               | 99.1 (99.1)               | 98.2 (97.1)               | 99.6 (97.1)               |
| Mean <i>I</i> / <i>σ</i> ( <i>I</i> ) | 8.8 (1.0)                 | 17.5 (1.1)                | 7.3 (1.2)                 | 7.8 (0.6)                 |
| Wilson B-factor (Å <sup>2</sup> )     | 36.16                     | 33.37                     | 68.84                     | 61.40                     |
| <i>R</i> <sub>meas</sub> (%)          | 11.5 (162.8)              | 5.4 (168.3)               | 20.0 (149.8)              | 15.7 (271.4)              |
| <i>R</i> <sub>pim</sub> (%)           | 5.1 (73.4)                | 2.1 (66.8)                | 9.9 (73.4)                | 7.2 (127.1)               |
| CC <sub>1/2</sub>                     | 1.00 (0.57)               | 1.00 (0.62)               | 0.99 (0.50)               | 1.00 (0.22)               |
| CC*                                   | 1.00 (0.85)               | 1.00 (0.88)               | 1.00 (0.82)               | 1.00 (0.60)               |
| <b>Refinement</b>                     |                           |                           |                           |                           |
| Reflections                           | 44558 (4369)              | 61681 (6056)              | 22701 (2223)              | 14993 (1455)              |
| Free reflections                      | 2287 (224)                | 3155 (308)                | 1189 (117)                | 1503 (148)                |
| <i>R</i> <sub>work</sub> (%)          | 22.13 (39.50)             | 20.13 (37.21)             | 25.36 (41.19)             | 23.42 (39.52)             |
| <i>R</i> <sub>free</sub> (%)          | 24.76 (40.39)             | 23.45 (40.68)             | 30.98 (42.06)             | 28.04 (41.51)             |
| CC <sub>work</sub>                    | 0.95 (0.66)               | 0.96 (0.73)               | 0.93 (0.61)               | 0.94 (0.44)               |
| CC <sub>free</sub>                    | 0.89 (0.73)               | 0.93 (0.64)               | 0.85 (0.44)               | 0.91 (0.34)               |
| Number of non-hydrogen atoms          | 3880                      | 3985                      | 7360                      | 2572                      |
| macromolecules                        | 3686                      | 3704                      | 7258                      | 2508                      |
| ligands                               | 73                        | 63                        | 102                       | 42                        |
| solvent                               | 121                       | 218                       | 0                         | 22                        |
| Protein residues                      | 477                       | 476                       | 939                       | 318                       |
| RMS deviations                        |                           |                           |                           |                           |
| bonds (Å)                             | 0.006                     | 0.012                     | 0.004                     | 0.009                     |
| angles (°)                            | 0.92                      | 1.34                      | 0.96                      | 1.38                      |
| Ramachandran plot                     |                           |                           |                           |                           |
| favored (%)                           | 99.16                     | 99.16                     | 98.05                     | 98.33                     |
| allowed (%)                           | 0.84                      | 0.84                      | 1.95                      | 1.67                      |
| outliers (%)                          | 0                         | 0                         | 0                         | 0                         |
| Rotamer outliers (%)                  | 0.78                      | 0.52                      | 0.39                      | 1.04                      |
| Clashscore                            | 1.07                      | 1.74                      | 2.4                       | 7.55                      |
| Average B-factor (Å <sup>2</sup> )    | 51.99                     | 57.85                     | 77.75                     | 76.14                     |
| macromolecules                        | 52.36                     | 58.33                     | 77.82                     | 75.51                     |
| ligands                               | 52.39                     | 72.01                     | 72.74                     | 124.72                    |
| solvent                               | 40.59                     | 45.67                     | -                         | 55.96                     |

Parameters for the outermost shell are shown in parentheses. *I*/*σ*(*I*): signal-to-noise ratio;  $R_{meas} = \frac{\sum_{hkl} \sqrt{(n/n-1)} \sum_i |I_i(hkl) - I(hkl)|}{\sum_{hkl} \sum_i I_i(hkl)}$ ;  $R_{pim} = \frac{\sum_{hkl} \sqrt{(1/n-1)} \sum_i |I_i(hkl) - I(hkl)|}{\sum_{hkl} \sum_i I_i(hkl)}$ , where *I*<sub>*i*</sub>(*hkl*) is the intensity for an observation of a reflection and *I*(*hkl*) is the average intensity of all symmetry-related observations of a reflection; CC<sub>1/2</sub>: percentage of correlation between intensities from random half-datasets;  $CC^* = \sqrt{(2CC_{1/2}/1+CC_{1/2})}$ ;  $R_{work} = \frac{\sum_{hkl} |F_{obs} - kF_{calc}|}{\sum_{hkl} |F_{obs}|}$ ; *R*<sub>free</sub>: same as *R*<sub>work</sub> calculated from free reflections excluded from refinement; CC<sub>work</sub>: correlation of the experimental intensities with the intensities calculated from the refined molecular model; CC<sub>free</sub>: correlation of the experimental intensities of free reflections excluded from the refinement with the intensities calculated from the refined molecular model.

**Table S2. Data Collection and Refinement Statistics for ZP2 ZP-N1, Related to Figure 1**

| <b>ZP2 ZP-N1</b>                      |                           |
|---------------------------------------|---------------------------|
| <b>[PDB: 5II6]</b>                    |                           |
| <b>Data Collection</b>                |                           |
| Wavelength (Å)                        | 0.8856                    |
| Resolution range (Å)                  | 31.4 - 0.95 (0.98 - 0.95) |
| Space group                           | <i>P</i> 21 21 21 (19)    |
| Cell dimensions                       |                           |
| <i>a</i> , <i>b</i> , <i>c</i> (Å)    | 39.54, 50.01, 51.75       |
| $\alpha$ , $\beta$ , $\gamma$ (°)     | 90, 90, 90                |
| Total reflections                     | 128064 (11086)            |
| Unique reflections                    | 64506 (5816)              |
| Multiplicity                          | 2.0 (1.9)                 |
| Completeness (%)                      | 98.7 (90.2)               |
| Mean <i>I</i> / $\sigma$ ( <i>I</i> ) | 13.0 (2.7)                |
| Wilson B-factor (Å <sup>2</sup> )     | 11.02                     |
| R <sub>meas</sub> (%)                 | 3.2 (34.2)                |
| R <sub>pim</sub> (%)                  | 2.2 (24.2)                |
| CC <sub>1/2</sub>                     | 1.00 (0.77)               |
| CC*                                   | 1.00 (0.93)               |
| <b>Refinement</b>                     |                           |
| Reflections                           | 64499 (5816)              |
| Free reflections                      | 3230 (304)                |
| R <sub>work</sub> (%)                 | 12.68 (21.49)             |
| R <sub>free</sub> (%)                 | 14.44 (22.69)             |
| CC <sub>work</sub>                    | 0.97 (0.89)               |
| CC <sub>free</sub>                    | 0.96 (0.85)               |
| Number of non-hydrogen atoms          | 1048                      |
| macromolecules                        | 901                       |
| ligands                               | 0                         |
| solvent                               | 147                       |
| Protein residues                      | 100                       |
| RMS deviations                        |                           |
| bonds (Å)                             | 0.016                     |
| angles (°)                            | 1.67                      |
| Ramachandran plot                     |                           |
| favored (%)                           | 96.88                     |
| allowed (%)                           | 3.12                      |
| outliers (%)                          | 0                         |
| Rotamer outliers (%)                  | 0.99                      |
| Clashscore                            | 4.53                      |
| Average B-factor (Å <sup>2</sup> )    | 16.24                     |
| macromolecules                        | 14.2                      |
| ligands                               | -                         |
| solvent                               | 28.73                     |

Parameters for the outermost shell are shown in parentheses. *I*/ $\sigma$ (*I*): signal-to-noise ratio;  $R_{meas} = \sum_{nkl} \sqrt{(n/n-1)} \sum |I_i(hkl) - I(hkl)| / \sum_{nkl} \sum I_i(hkl)$ ;  $R_{pim} = \sum_{nkl} \sqrt{(1/n-1)} \sum |I_i(hkl) - I(hkl)| / \sum_{nkl} \sum I_i(hkl)$ , where *I*<sub>*i*</sub>(*hkl*) is the intensity for an observation of a reflection and *I*(*hkl*) is the average intensity of all symmetry-related observations of a reflection; CC<sub>1/2</sub>: percentage of correlation between intensities from random half-datasets;  $CC^* = \sqrt{(2CC_{1/2}/1+CC_{1/2})}$ ;  $R_{work} = \sum_{nkl} | |F_{obs}| - |F_{calc}| | / \sum_{nkl} |F_{obs}|$ ;  $R_{free}$ : same as  $R_{work}$  calculated from free reflections excluded from refinement; CC<sub>work</sub>: correlation of the experimental intensities with the intensities calculated from the refined molecular model; CC<sub>free</sub>: correlation of the experimental intensities of free reflections excluded from the refinement with the intensities calculated from the refined molecular model.

**Table S3. Data Collection and Refinement Statistics for Lysin<sup>R</sup>, Related to Figure 7**

|                                       | Orthorhombic lysin <sup>R</sup><br>(S-SAD)<br>[PDB: 5I17] | Orthorhombic lysin <sup>R</sup><br>(high resolution)<br>[PDB: 5I18] | Monoclinic lysin <sup>R</sup><br>[PDB: 5I19] |
|---------------------------------------|-----------------------------------------------------------|---------------------------------------------------------------------|----------------------------------------------|
| <b>Data Collection</b>                |                                                           |                                                                     |                                              |
| Wavelength (Å)                        | 1.542                                                     | 0.886                                                               | 1.029                                        |
| Resolution range (Å)                  | 43.2 - 1.66 (1.72 - 1.66)                                 | 31.6 - 0.99 (1.02 - 0.99)                                           | 27.3 - 2.11 (2.18 - 2.11)                    |
| Space group                           | <i>P</i> 21 21 21 (19)                                    | <i>P</i> 21 21 21 (19)                                              | <i>P</i> 1 21 1 (4)                          |
| Cell dimensions                       |                                                           |                                                                     |                                              |
| <i>a</i> , <i>b</i> , <i>c</i> (Å)    | 45.20, 51.19, 80.42                                       | 45.21, 51.05, 80.53                                                 | 39.19, 69.34, 182.75                         |
| $\alpha$ , $\beta$ , $\gamma$ (°)     | 90, 90, 90                                                | 90, 90, 90                                                          | 90, 90.01, 90                                |
| Total reflections                     | 135781 (432)                                              | 480552 (43518)                                                      | 125117 (10244)                               |
| Unique reflections                    | 19219 (359)                                               | 98373 (9051)                                                        | 52122 (5036)                                 |
| Multiplicity                          | 7.1 (1.2)                                                 | 4.9 (4.8)                                                           | 2.4 (2.0)                                    |
| Completeness (%)                      | 84.8 (16.2)                                               | 94.3 (87.7)                                                         | 92.0 (88.7)                                  |
| Mean <i>I</i> / $\sigma$ ( <i>I</i> ) | 49.5 (6.5)                                                | 11.9 (1.2)                                                          | 10.4 (2.3)                                   |
| Wilson B-factor (Å <sup>2</sup> )     | 13.2                                                      | 11.79                                                               | 27.47                                        |
| R <sub>meas</sub> (%)                 | 3.9 (19.3)                                                | 5.9 (199.0)                                                         | 7.7 (48.6)                                   |
| R <sub>pim</sub> (%)                  | 1.3 (13.0)                                                | 2.6 (89.3)                                                          | 4.6 (30.0)                                   |
| CC <sub>1/2</sub>                     | 1.00 (0.95)                                               | 1.00 (0.38)                                                         | 1.00 (0.76)                                  |
| CC*                                   | 1.00 (0.99)                                               | 1.00 (0.74)                                                         | 1.00 (0.93)                                  |
| <b>Refinement</b>                     |                                                           |                                                                     |                                              |
| Reflections                           | 19195 (359)                                               | 98352 (9051)                                                        | 52119 (5036)                                 |
| Free reflections                      | 1929 (43)                                                 | 9849 (898)                                                          | 2660 (266)                                   |
| R <sub>work</sub> (%)                 | 15.62 (24.67)                                             | 16.42 (30.65)                                                       | 19.79 (25.63)                                |
| R <sub>free</sub> (%)                 | 18.80 (37.33)                                             | 19.09 (33.25)                                                       | 22.97 (29.38)                                |
| CC <sub>work</sub>                    | 0.95 (0.86)                                               | 0.96 (0.68)                                                         | 0.95 (0.80)                                  |
| CC <sub>free</sub>                    | 0.94 (0.88)                                               | 0.93 (0.62)                                                         | 0.92 (0.75)                                  |
| Number of non-hydrogen atoms          | 1507                                                      | 1448                                                                | 7181                                         |
| macromolecules                        | 1168                                                      | 1146                                                                | 6666                                         |
| ligands                               | 57                                                        | 77                                                                  | 0                                            |
| solvent                               | 282                                                       | 225                                                                 | 515                                          |
| Protein residues                      | 132                                                       | 131                                                                 | 784                                          |
| RMS deviations                        |                                                           |                                                                     |                                              |
| bonds (Å)                             | 0.006                                                     | 0.015                                                               | 0.005                                        |
| angles (°)                            | 0.96                                                      | 1.59                                                                | 0.99                                         |
| Ramachandran plot                     |                                                           |                                                                     |                                              |
| favored (%)                           | 100                                                       | 100                                                                 | 100                                          |
| allowed (%)                           | 0                                                         | 0                                                                   | 0                                            |
| outliers (%)                          | 0                                                         | 0                                                                   | 0                                            |
| Rotamer outliers (%)                  | 0.82                                                      | 0                                                                   | 0.29                                         |
| Clashscore                            | 2.46                                                      | 4.13                                                                | 1.41                                         |
| Average B-factor (Å <sup>2</sup> )    | 18.93                                                     | 18.85                                                               | 34.58                                        |
| macromolecules                        | 16.26                                                     | 14.39                                                               | 34.55                                        |
| ligands                               | 37.06                                                     | 46.01                                                               | -                                            |
| solvent                               | 26.33                                                     | 32.27                                                               | 34.99                                        |

Parameters for the outermost shell are shown in parentheses. *I*/ $\sigma$ (*I*): signal-to-noise ratio;  $R_{meas} = \frac{\sum_{hkl} \sqrt{(n/n-1) \sum_{i|j} I_i(hkl) - I(hkl)} / \sum_{hkl} \sum_i I_i(hkl)}$ ;  $R_{pim} = \frac{\sum_{hkl} \sqrt{(1/n-1) \sum_{i|j} I_i(hkl) - I(hkl)} / \sum_{hkl} \sum_i I_i(hkl)}$ , where *I*<sub>*i*</sub>(*hkl*) is the intensity for an observation of a reflection and *I*(*hkl*) is the average intensity of all symmetry-related observations of a reflection; CC<sub>1/2</sub>: percentage of correlation between intensities from random half-datasets;  $CC^* = \sqrt{(2CC_{1/2}/(1+CC_{1/2}))}$ ;  $R_{work} = \frac{\sum_{hkl} | |F_{obs} - k|F_{calc} | | \sum_{hkl} |F_{obs} | |}$ ;  $R_{free}$ : same as  $R_{work}$  calculated from free reflections excluded from refinement; CC<sub>work</sub>: correlation of the experimental intensities with the intensities calculated from the refined molecular model; CC<sub>free</sub>: correlation of the experimental intensities of free reflections excluded from the refinement with the intensities calculated from the refined molecular model.

**Table S4. Data Collection and Refinement Statistics for VERL/Lysin Complexes, Related to Figures 3, 4, 5, 6 and 7**

|                                       | Triclinic VR3/lysin complex<br>[PDB: 5IIA] | Trigonal VR3/lysin complex<br>[PDB: 5IIB] | VR2+/lysin complex<br>[PDB: 5MR3] |
|---------------------------------------|--------------------------------------------|-------------------------------------------|-----------------------------------|
| <b>Data Collection</b>                |                                            |                                           |                                   |
| Wavelength (Å)                        | 0.972                                      | 0.976                                     | 1.072                             |
| Resolution range (Å)                  | 48.7 - 1.70 (1.77 - 1.70)                  | 32.2 - 1.64 (1.70 - 1.64)                 | 43.9 - 1.80 (1.86 - 1.80)         |
| Space group                           | <i>P</i> 1 (1)                             | <i>P</i> 31 2 1 (152)                     | <i>P</i> 1 21 1 (4)               |
| Cell dimensions                       |                                            |                                           |                                   |
| <i>a</i> , <i>b</i> , <i>c</i> (Å)    | 60.49, 60.33, 89.17                        | 64.50, 64.50, 129.93                      | 75.87, 87.86, 92.55               |
| $\alpha$ , $\beta$ , $\gamma$ (°)     | 105.04, 89.04, 113.28                      | 90, 90, 120                               | 90, 100.92, 90                    |
| Total reflections                     | 412456 (52385)                             | 210912 (21243)                            | 372220 (37258)                    |
| Unique reflections                    | 119274 (14764)                             | 39053 (3892)                              | 109992 (10977)                    |
| Multiplicity                          | 3.5 (3.5)                                  | 5.4 (5.5)                                 | 3.4 (3.4)                         |
| Completeness (%)                      | 97.3 (96.3)                                | 99.5 (98.8)                               | 99.5 (99.6)                       |
| Mean <i>I</i> / $\sigma$ ( <i>I</i> ) | 9.6 (0.8)                                  | 12.4 (0.8)                                | 11.5 (1.0)                        |
| Wilson B-factor (Å <sup>2</sup> )     | 35.28                                      | 34.67                                     | 34.22                             |
| <i>R</i> <sub>meas</sub> (%)          | 5.8 (199.3)                                | 5.4 (231.0)                               | 6.4 (177.3)                       |
| <i>R</i> <sub>pim</sub> (%)           | 3.1 (104.1)                                | 2.3 (97.6)                                | 3.4 (94.5)                        |
| CC <sub>1/2</sub>                     | 1.00 (0.27)                                | 1.00 (0.51)                               | 1.00 (0.31)                       |
| CC*                                   | 1.00 (0.65)                                | 1.00 (0.82)                               | 1.00 (0.68)                       |
| <b>Refinement</b>                     |                                            |                                           |                                   |
| Reflections                           | 119231 (14753)                             | 38972 (3847)                              | 109971 (10966)                    |
| Free reflections                      | 3799 (470)                                 | 1850 (180)                                | 5503 (548)                        |
| <i>R</i> <sub>work</sub> (%)          | 17.79 (39.01)                              | 19.38 (40.60)                             | 20.26 (39.31)                     |
| <i>R</i> <sub>free</sub> (%)          | 20.24 (39.48)                              | 20.82 (44.81)                             | 22.86 (42.76)                     |
| CC <sub>work</sub>                    | 0.97 (0.58)                                | 0.95 (0.64)                               | 0.96 (0.52)                       |
| CC <sub>free</sub>                    | 0.96 (0.59)                                | 0.95 (0.53)                               | 0.95 (0.40)                       |
| Number of non-hydrogen atoms          | 8257                                       | 2093                                      | 8543                              |
| macromolecules                        | 7568                                       | 1901                                      | 7833                              |
| ligands                               | 112                                        | 66                                        | 150                               |
| solvent                               | 577                                        | 126                                       | 560                               |
| Protein residues                      | 922                                        | 232                                       | 959                               |
| RMS deviations                        |                                            |                                           |                                   |
| bonds (Å)                             | 0.008                                      | 0.007                                     | 0.005                             |
| angles (°)                            | 1.19                                       | 1.21                                      | 1.12                              |
| Ramachandran plot                     |                                            |                                           |                                   |
| favored (%)                           | 99.78                                      | 99.56                                     | 99.36                             |
| allowed (%)                           | 0.22                                       | 0.44                                      | 0.64                              |
| outliers (%)                          | 0                                          | 0                                         | 0                                 |
| Rotamer outliers (%)                  | 0.85                                       | 0                                         | 0.12                              |
| Clashscore                            | 1.82                                       | 0.51                                      | 3.37                              |
| Average B-factor (Å <sup>2</sup> )    | 47.69                                      | 48.17                                     | 51.13                             |
| macromolecules                        | 47.37                                      | 47.23                                     | 50.9                              |
| ligands                               | 71.69                                      | 78.47                                     | 95.78                             |
| solvent                               | 47.17                                      | 46.44                                     | 42.32                             |

Parameters for the outermost shell are shown in parentheses. *I*/ $\sigma$ (*I*): signal-to-noise ratio;  $R_{meas} = \sum_{hkl} \sqrt{(n/n-1)} \sum_i |I_i(hkl) - I(hkl)| / \sum_{hkl} \sum_i I_i(hkl)$ ;  $R_{pim} = \sum_{hkl} \sqrt{(1/n-1)} \sum_i |I_i(hkl) - I(hkl)| / \sum_{hkl} \sum_i I_i(hkl)$ , where *I*<sub>*i*</sub>(*hkl*) is the intensity for an observation of a reflection and *I*(*hkl*) is the average intensity of all symmetry-related observations of a reflection; CC<sub>1/2</sub>: percentage of correlation between intensities from random half-datasets;  $CC^* = \sqrt{(2CC_{1/2}/(1+CC_{1/2}))}$ ;  $R_{work} = \sum_{hkl} |F_{obs} - k| F_{calc}| / \sum_{hkl} |F_{obs}|$ ; *R*<sub>free</sub>: same as *R*<sub>work</sub> calculated from free reflections excluded from refinement; CC<sub>work</sub>: correlation of the experimental intensities with the intensities calculated from the refined molecular model; CC<sub>free</sub>: correlation of the experimental intensities of free reflections excluded from the refinement with the intensities calculated from the refined molecular model.

**Table S5. Protein-Protein Interactions in the Trigonal Structure of the VR3/Lysin Complex [PDB: 5IIB], Related to Figures 3 and 4**

| <b>Lysin</b>                               |                | <b>VR3</b> |               |                   |
|--------------------------------------------|----------------|------------|---------------|-------------------|
| <b>Hydrogen bonds</b>                      |                |            |               |                   |
| R 74                                       | ( $\alpha 2$ ) | F 385      |               | SM (2 H-bonds)    |
| R 74                                       | ( $\alpha 2$ ) | I 387      | ( $\beta E$ ) | SM                |
| T 78                                       | ( $\alpha 2$ ) | T 382      |               | MM                |
| T 78                                       | ( $\alpha 2$ ) | N 388      | ( $\beta E$ ) | SS                |
| H 79                                       | ( $\alpha 2$ ) | M 389      | ( $\beta E$ ) | SM                |
| N 82                                       | ( $\alpha 2$ ) | P 380      | ( $\beta D$ ) | SM                |
| W 86                                       | ( $\alpha 2$ ) | D 401      |               | SS                |
| K 90                                       | ( $\alpha 2$ ) | D 401      |               | SS (salt bridge)  |
| R 113                                      | ( $\alpha 3$ ) | D 401      |               | SM                |
| Y 135                                      | ( $\alpha 5$ ) | I 387      | ( $\beta E$ ) | SM                |
| <b>Ion pair</b>                            |                |            |               |                   |
| K 150                                      |                | E 384      |               |                   |
| <b>Hydrophobic interactions</b>            |                |            |               |                   |
| F 70                                       | ( $\alpha 2$ ) | I 387      | ( $\beta E$ ) |                   |
| V 71                                       | ( $\alpha 2$ ) | M 389      | ( $\beta E$ ) |                   |
| A 81                                       | ( $\alpha 2$ ) | P 380      | ( $\beta D$ ) |                   |
| Y 83                                       | ( $\alpha 2$ ) | P 403      |               |                   |
| L 85                                       | ( $\alpha 2$ ) | P 380      | ( $\beta D$ ) |                   |
| W 86                                       | ( $\alpha 2$ ) | P 403      |               |                   |
| I 114                                      |                | L 391      | ( $\beta E$ ) |                   |
| Y 118                                      | ( $\alpha 4$ ) | P 352      |               |                   |
| F 119                                      | ( $\alpha 4$ ) | M 389      | ( $\beta E$ ) | aromatic-sulfur   |
| F 119                                      | ( $\alpha 4$ ) | L 391      | ( $\beta E$ ) |                   |
| F 122                                      | ( $\alpha 4$ ) | Y 344      | ( $\beta A$ ) | aromatic-aromatic |
| F 122                                      | ( $\alpha 4$ ) | I 356      | ( $\beta B$ ) |                   |
| M 128                                      |                | Y 344      | ( $\beta A$ ) | aromatic-sulfur   |
| P 130                                      |                | I 387      | ( $\beta E$ ) |                   |
| Y 135                                      | ( $\alpha 5$ ) | F 385      |               | aromatic-aromatic |
| <b>Cation-<math>\pi</math> interaction</b> |                |            |               |                   |
| F 122                                      | ( $\alpha 4$ ) | K 354      | ( $\beta B$ ) |                   |
| <b>Non-bonded contacts</b>                 |                |            |               |                   |
| Y 75                                       | ( $\alpha 2$ ) | M 389      | ( $\beta E$ ) |                   |
| Q 77                                       | ( $\alpha 2$ ) | T 382      |               |                   |
| Q 77                                       | ( $\alpha 2$ ) | E 384      |               |                   |
| T 78                                       | ( $\alpha 2$ ) | I 381      | ( $\beta D$ ) |                   |
| H 79                                       | ( $\alpha 2$ ) | M 390      | ( $\beta E$ ) |                   |
| N 82                                       | ( $\alpha 2$ ) | V 379      | ( $\beta D$ ) |                   |
| N 82                                       | ( $\alpha 2$ ) | I 381      | ( $\beta D$ ) |                   |
| N 82                                       | ( $\alpha 2$ ) | G 404      |               |                   |
| W 86                                       | ( $\alpha 2$ ) | S 402      |               |                   |
| Y 135                                      | ( $\alpha 5$ ) | G 386      | ( $\beta E$ ) |                   |

SM, side chain-main chain; MM, main chain-main-chain; SS, side chain-side chain. All interactions are within 4 Å distance.

**Table S6. Protein-Protein Interactions in the Structure of the VR2+/Lysin Complex [PDB: 5MR3], Related to Figure 6**

| <b>Lysin</b>                               |     | <b>VR2+</b>    |                     |                   |
|--------------------------------------------|-----|----------------|---------------------|-------------------|
| <b>Hydrogen bonds</b>                      |     |                |                     |                   |
| R                                          | 74  | ( $\alpha 2$ ) | H 222               | SM (2 H-bonds)    |
| R                                          | 74  | ( $\alpha 2$ ) | F 224 ( $\beta E$ ) | SM (2 H-bonds)    |
| T                                          | 78  | ( $\alpha 2$ ) | T 219               | MM (2 H-bonds)    |
| T                                          | 78  | ( $\alpha 2$ ) | N 225 ( $\beta E$ ) | SS (3 H-bonds)    |
| H                                          | 79  | ( $\alpha 2$ ) | M 226 ( $\beta E$ ) | SM                |
| R                                          | 113 | ( $\alpha 3$ ) | D 238               | SM (2 H-bonds)    |
| Y                                          | 135 | ( $\alpha 5$ ) | F 224 ( $\beta E$ ) | SM                |
| <b>Ion pair</b>                            |     |                |                     |                   |
| K                                          | 150 |                | E 221               |                   |
| <b>Hydrophobic interactions</b>            |     |                |                     |                   |
| V                                          | 71  | ( $\alpha 2$ ) | M 226 ( $\beta E$ ) |                   |
| Y                                          | 75  | ( $\alpha 2$ ) | M 226 ( $\beta E$ ) |                   |
| L                                          | 85  | ( $\alpha 2$ ) | P 217 ( $\beta D$ ) |                   |
| W                                          | 86  | ( $\alpha 2$ ) | P 240               |                   |
| Y                                          | 118 | ( $\alpha 4$ ) | P 189               |                   |
| F                                          | 119 | ( $\alpha 4$ ) | M 226 ( $\beta E$ ) | aromatic-sulfur   |
| F                                          | 119 | ( $\alpha 4$ ) | L 228 ( $\beta E$ ) |                   |
| F                                          | 122 | ( $\alpha 4$ ) | F 181 ( $\beta A$ ) | aromatic-aromatic |
| F                                          | 122 | ( $\alpha 4$ ) | I 193 ( $\beta B$ ) |                   |
| M                                          | 128 |                | F 181 ( $\beta A$ ) | aromatic-sulfur   |
| P                                          | 130 |                | F 224 ( $\beta E$ ) |                   |
| <b>Cation-<math>\pi</math> interaction</b> |     |                |                     |                   |
| F                                          | 122 | ( $\alpha 4$ ) | K 191 ( $\beta B$ ) |                   |
| <b>Non-bonded contacts</b>                 |     |                |                     |                   |
| R                                          | 74  | ( $\alpha 2$ ) | N 225 ( $\beta E$ ) |                   |
| R                                          | 74  | ( $\alpha 2$ ) | E 221               |                   |
| H                                          | 79  | ( $\alpha 2$ ) | I 218 ( $\beta D$ ) |                   |
| N                                          | 82  | ( $\alpha 2$ ) | P 217 ( $\beta D$ ) |                   |
| N                                          | 82  | ( $\alpha 2$ ) | G 241               |                   |
| N                                          | 82  | ( $\alpha 2$ ) | V 216 ( $\beta D$ ) |                   |
| Y                                          | 83  | ( $\alpha 2$ ) | P 240               |                   |
| Y                                          | 135 | ( $\alpha 5$ ) | G 223 ( $\beta E$ ) |                   |
